# Supplementary material for: Protective function of sclerosing cholangitis on IBD
Source: HighWire-hosted journal article supplement (doi:10.1136/gutjnl-2023-330856), 2024-06-05
Supplement: gutjnl-2023-330856supp003_data_supplement.pdf [file gutjnl-2023-330856supp003_data_supplement.pdf]

**Table S1. Characteristics of microbiota donors.**

|                                    | <b>IBD</b> | <b>PSC-IBD</b> | <b>PBC</b> |
|------------------------------------|------------|----------------|------------|
| n-value                            | 6          | 5              | 2          |
| age in years                       | 41±15.2    | 43±9.7         | 65±2.2     |
| sex male (%)                       | 4 (66%)    | 3 (60%)        | 2 (100%)   |
| <b>IBD disease activity, n (%)</b> |            |                |            |
| Remission                          | 2 (33%)    | 3 (60%)        | 0 (0%)     |
| Mild                               | 2 (33%)    | 0 (0%)         | 0 (0%)     |
| Moderate                           | 1 (16%)    | 2 (40%)        | 0 (0%)     |
| Severe                             | 1 (16%)    | 0 (0%)         | 0 (0%)     |
| <b>Medications, n (%)</b>          |            |                |            |
| 5-ASA                              | 4 (66%)    | 3 (60%)        | 0 (0%)     |
| Thiopurines                        | 2 (33%)    | 1 (20%)        | 0 (0%)     |
| Anti-TNF                           | 1 (16%)    | 2 (40%)        | 0 (0%)     |
| Anti-IL12/23                       | 1 (16%)    | 0 (0%)         | 0 (0%)     |
| UDCA                               | 0          | 5/5 (100%)     | 2/2 (100%) |
| Methotrexate                       | 1 (16%)    | 0 (0%)         | 0 (0%)     |

\*IBD disease activity was categorized based on Mayo score for UC (remission: 0-2, mild: 3-5, moderate: 6-10, severe 11-12 points).
